# Supplementary material for: Aqueous route for the synthesis of magnetite nanoparticles under atmospheric air: functionalization of surface with fluorescence marker
Source: Royal Society of Chemistry journal article supplement (doi:10.1039/c2tx20004j), 2012-01-01
Supplement: c2tx20004j.pdf [file c2tx20004j.pdf]

## Aqueous route for the synthesis of magnetite nanoparticles under atmospheric air: Functionalization of surface with fluorescence marker

*Nagaprasad puvvada, Dhritabrata Mandal, Pravas Kumar Panigrahi and Amita Pathak*

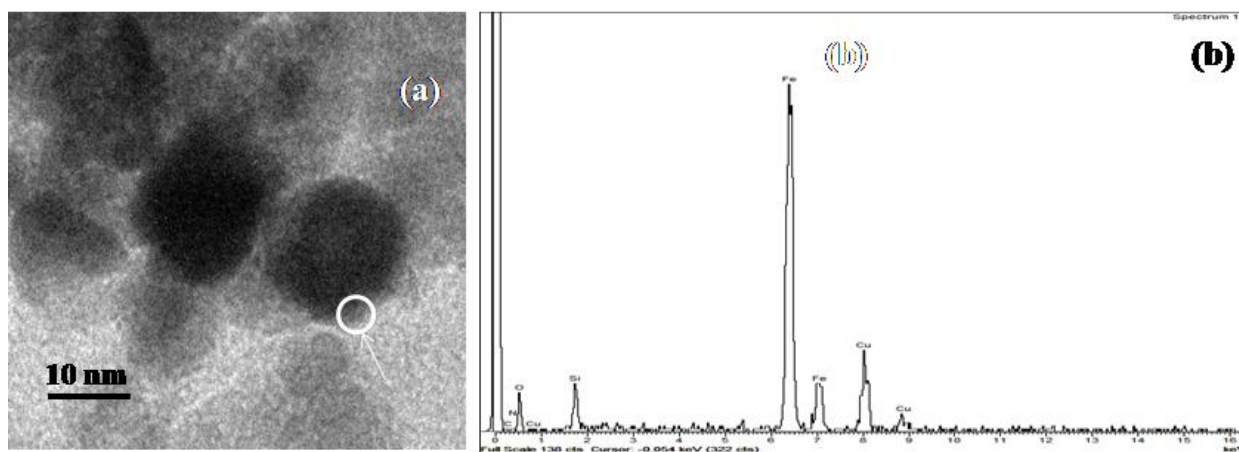

Figure S1: Higher magnification of TEM image (a) and corresponding EDX (b) of AMNPs

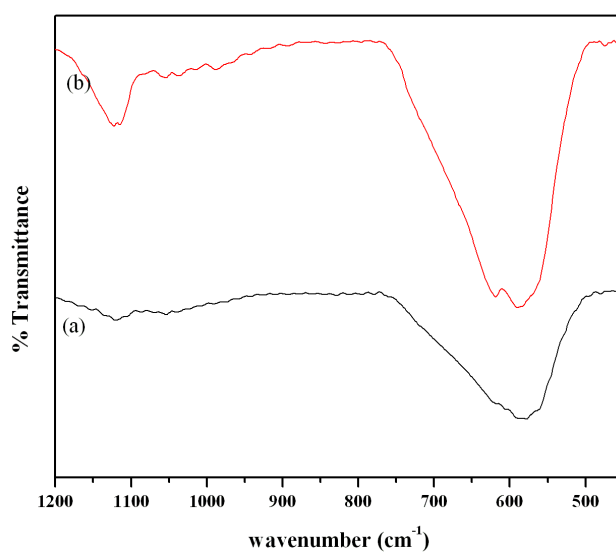

Figure S2: (a) MNP and (b) AMNP samples FTIR spectra
